# Supplementary material for: Pressure-induced phase transition in hydrogen-bonded molecular crystal acetamide: combined Raman scattering and X-ray diffraction study
Source: Royal Society of Chemistry journal article supplement (doi:10.1039/c5ra17223c), 2015-01-01

## **Supplementary materials**

### **Pressure-Induced Phase Transition in Hydrogen-Bonded Molecular**

### **Crystal Acetamide: Combined Raman Scattering and X-ray**

### **Diffraction Study**

Lei Kang,<sup>a</sup> Kai Wang,<sup>\*a</sup> Shourui Li,<sup>a</sup> Xiaodong Li<sup>b</sup> and Bo Zou<sup>\*a</sup>

<sup>a.</sup> *State Key Laboratory of Superhard Materials, Jilin University, Changchun 130012, China. Email: zoubo@jlu.edu.cn; kaiwang@jlu.edu.cn*

<sup>b.</sup> *Beijing Synchrotron Radiation Laboratory, Institute of High Energy Physics, Chinese Academy of Sciences, Beijing 100039, China*

Fig. S1. The summarized phases of acetamide at different pressures and room temperature. Phase I is the stable phase at ambient pressure. Phase II and III are the new phases discovered in this experiment. Phase IV is the metastable phase at ambient pressure. Phase V is the phase discovered in the high-pressure crystallization experiment.

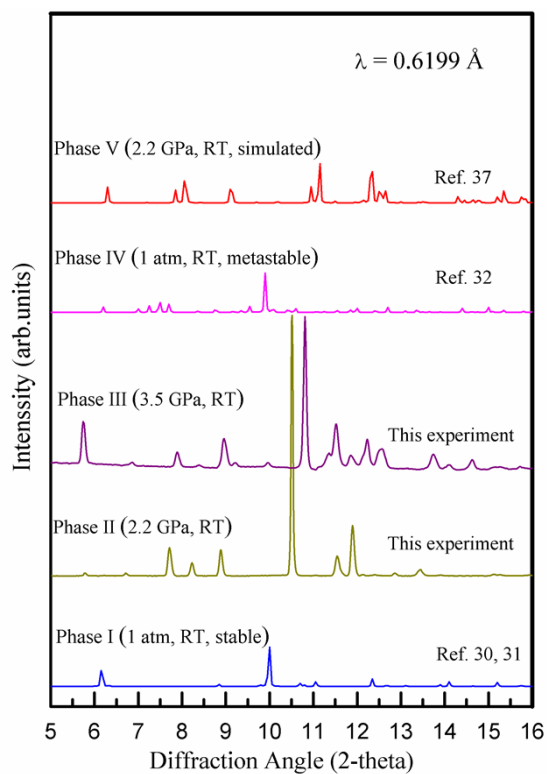

Supplement: c5ra17223c1.pdf [file c5ra17223c1.pdf]
